# Supplementary material for: Direct link between iceberg melt and diatom productivity demonstrated in Mid-Pliocene Amundsen Sea interglacial sediments
Source: Copernicus journal article supplement (doi:10.5194/jm-43-269-2024), 2024-08-01
Supplement: Supplementary file 1 [file Heather_Furlong-Supplementary_Data 6-20.xlsx]

## Sheet: Sample Location
Grant Funding: NSF OPP ANT 1939139
All samples analyzed come from IODP Expedition 379, Amundsen Sea, Antarctica, 1019
Site Coordinates: U1532 (68˚ 36.6952’S, 107˚ 31.4721’W)

## Sheet: Absolute Diatom Abundance
Expedition	Site	Hole	Core	Type	Section	Depth (mbsf)	Depth (cm)	Mass (g)	# Diatoms Counted	Fields of View on Slide	# Fields of View	Field of View Area (mm2)	Beaker Area (mm2)	Dry Sediment Mass (g)	ADA
IODP 379	U1532	C	6	F	1	198.4	130	0.0227	300	102	1020	0.022	14400	0.0227	8.48077e+06
IODP 379	U1532	C	6	F	2	198.7	10	0.0231	300	102	510	0.022	14400	0.0231	1.66678e+07
IODP 379	U1532	C	6	F	2	198.5	140	0.0264	0	102	2040	0.022	14400	0.08	0
IODP 379	U1532	C	6	F	1	197.7	59.5	0.02	300	102	408	0.022	14400	0.02	2.40642e+07
IODP 379	U1532	C	6	F	1	198.3	120	0.0371	300	102	714	0.022	14400	0.025	1.10008e+07
IODP 379	U1532	C	6	F	1	197.9	79.5	0.0287	300	102	306	0.022	14400	0.024	2.6738e+07
IODP 379	U1532	C	6	F	2	199.25	65.5	0.0237	0	102	2040	0.022	14400	0.08	0
IODP 379	U1532	C	6	F	2	198.95	35	0.0259	0	102	2040	0.022	14400	0.08	0
IODP 379	U1532	C	6	F	1	197.75	65	0.0281	300	102	612	0.022	14400	0.023	1.39502e+07
IODP 379	U1532	C	6	F	2	198.55	145	0.0246	0	102	2040	0.022	14400	0.08	0
IODP 379	U1532	C	6	F	1	197.8	70	0.0254	300	102	918	0.022	14400	0.0254	8.42141e+06
IODP 379	U1532	C	6	F	1	197.45	35	0.0264	300	102	816	0.022	14400	0.0224	1.07429e+07
IODP 379	U1532	C	6	F	1	198.15	105	0.0235	300	102	510	0.022	14400	0.0235	1.63841e+07
IODP 379	U1532	C	6	F	2	199.2	60	0.02	0	102	2040	0.022	14400	0.08	0
IODP 379	U1532	C	6	F	2	199.4	80	0.0223	0	102	2040	0.022	14400	0.08	0
IODP 379	U1532	C	6	F	2	199	39	0.0293	0	102	2040	0.022	14400	0.08	0
IODP 379	U1532	C	6	F	2	198.45	85	0.02	300	102	408	0.022	14400	0.02	2.40642e+07
IODP 379	U1532	C	6	F	2	199.35	74.5	0.0314	0	102	2040	0.022	14400	0.08	0
IODP 379	U1532	C	6	F	1	197.95	85	0.0192	300	102	408	0.022	14400	0.02	2.40642e+07
IODP 379	U1532	C	6	F	1	198.25	114.5	0.02	300	102	612	0.022	14400	0.02	1.60428e+07
IODP 379	U1532	C	6	F	1	198.1	100	0.0279	300	102	816	0.022	14400	0.0239	1.00687e+07
IODP 379	U1532	C	6	F	1	197.6	50	0.0229	300	102	510	0.022	14400	0.0229	1.68134e+07
IODP 379	U1532	C	6	F	2	198.35	125	0.02	300	102	918	0.022	14400	0.02	1.06952e+07
IODP 379	U1532	C	6	F	1	198	89.5	0.02	300	102	1122	0.022	14400	0.02	8.75061e+06
IODP 379	U1532	C	6	F	2	198.6	1	0.02	0	102	2040	0.022	14400	0.08	0
IODP 379	U1532	C	6	F	1	198.2	101.5	0.0292	300	102	714	0.022	14400	0.0222	1.23882e+07
IODP 379	U1532	C	6	F	2	198.65	5	0.0294	300	102	1020	0.022	14400	0.0244	7.88989e+06
IODP 379	U1532	C	6	F	2	198.8	20	0.0266	300	102	510	0.022	14400	0.0216	1.78253e+07
IODP 379	U1532	C	6	F	2	199.3	70	0.0318	0	102	2040	0.022	14400	0.08	0
IODP 379	U1532	C	6	F	1	197.5	40	0.0229	300	102	306	0.022	14400	0.0229	2.80223e+07
IODP 379	U1532	C	6	F	2	198.85	25	0.0294	0	102	2040	0.022	14400	0.08	0
IODP 379	U1532	C	6	F	2	199.1	49.5	0.0318	0	102	2040	0.022	14400	0.08	0
IODP 379	U1532	C	6	F	2	199.15	53	0.037	0	102	2040	0.022	14400	0.08	0
IODP 379	U1532	C	6	F	1	197.85	74.5	0.0258	300	102	918	0.022	14400	0.0238	8.98755e+06
IODP 379	U1532	C	6	F	1	197.65	55	0.02	300	102	1224	0.022	14400	0.02	8.02139e+06
IODP 379	U1532	C	6	F	2	198.9	30	0.0202	0	102	2040	0.022	14400	0.08	0
IODP 379	U1532	C	6	F	2	198.75	15	0.0341	0	102	2040	0.022	14400	0.08	0
IODP 379	U1532	C	6	F	1	197.3	19	0.02	300	102	408	0.022	14400	0.02	2.40642e+07
IODP 379	U1532	C	6	F	1	197.35	25	0.02	300	102	612	0.022	14400	0.02	1.60428e+07
IODP 379	U1532	C	6	F	1	197.4	29.5	0.02	300	102	918	0.022	14400	0.02	1.06952e+07
IODP 379	U1532	C	6	F	1	197.55	45	0.02	300	102	306	0.022	14400	0.02	3.20856e+07

## Sheet: Biogenic Silica Protocol
Day 0
1. Prepare Solutions of:
a. Molybdate
b. 1 M HCl
c. Metol
d. Sulfuric acid
e. Oxalic Acid
2. Prepare KOH Solution
a. In a NALGENE container, fill with 1 L of nano-pure water.
b. Place NALGENE container on stir plate with magnetic stirrer
c. Weight out 112.5 g of KOH pellets and slowly add them to the water
d. Allow to mix until no residue is left at the bottom
e. Pour mixture into KOH bottle
3. Pick 16 or 32 samples that will be used for analyzes
4. In notebook follow this scheme for note taking
ID	CORE ID	WEIGHT	ABSORBANCE
1
2
3
4
5
6
7
5. Locate a pack of 50 mL Falcon centrifuge tubes and label each of the 16/32 tubes and caps you will be using with your sample ID and sample number (1-16/32).
6. Locate a tray of 20 mL scintillation vials and label them with the designated scheme
a. Vials labeled 1-16/32 and B, on cap and vial
b. Vials labeled *1-16/32 *B, on cap and vial
c. Vials labeled 0, 50, 100, 150, 200, 250, 300, 350, 400, 450, 500, on cap and vial
d. Vials labeled *0-500 on cap and vial
7. Homogenize each of your 16/32 samples, to a fine powder, using a mortar and pestle.
a. Between each homogenization, rinse the mortar and pestle with DI water
8. Weigh each of your homogenized samples using a mass balance to between (0.053-0.057 g).
a. After reaching the appropriate weight place each sample in its appropriately labeled 50 mL centrifuge tube.
b. Be sure to put the measured weight on the tube label.
9. Place tubes into Styrofoam holder for day 1 analyzes
Day 1
1. Pipette 5 mL of 30% hydrogen peroxide into each tube
a. Loosely place the caps back onto the tubes
b. Let the tubes effervesce for 2 hours on a shaker table at low-medium speed
2. Pipette 5 mL of 1 M HCl into each tube
a. Loosely place the caps back onto the tubes
b. Let the sediments react for 2-3 hours on a shaker table at low-medium speed
3. Pipette 20 mL of nano-pure water into each tube
a. Tightly close caps
4. Put each tube on the Analog Vortex Mixer at max speed for 1-2 seconds
5. Place all 16/32 tubes into a centrifuge at 3400 rpm for 20 min
6. Slowly decant each tube into waste beaker
7. Pipette 20 mL of nano-pure water into each tube
Day 2
1. Preheat muffle furnace to 80 ℃ for one hour
a. Make sure oven is empty prior to preheat
2. Centrifuge tubes at 3400 rpm for 20 min
3. Decant water into waste beaker
4. Add 40 mL of the KOH solution into each tube
5. Put each tube on the Analog Vortex Mixer at max speed for 1-2 seconds
6. Place all 16 tubes, with LOOSENED lids, into the Styrofoam holder and then place the holder in the 80℃ oven
a. After two hours remove the tubes, TIGHTEN the caps, and place individually in vortex mixer
b. Place holder with LOOSENED caps, back into oven for two more hours
c. After two more hours (4 hrs. in total) remove the tubes, TIGHTEN the caps, and place individually in vortex mixer
d. Place holder with LOOSENED caps, back into oven for one more hour
7. During this last hour, make standards
a. In your scintillation vials labeled B-500 follow the table below
i. Add the designated mL into each appropriate vial
Std	KOH	Liquid Std	H20
B	2 mL	0	0
0	1 mL	0	1
50	1 mL	0.1	0.9
100	1 mL	0.2	0.8
150	1 mL	0.3	0.7
200	1 mL	0.4	0.6
250	1 mL	0.5	0.5
300	1 mL	0.6	0.4
350	1 mL	0.7	0.3
400	1 mL	0.8	0.2
450	1 mL	0.9	0.1
500	1 mL	1	0
8. Also, during this hour, prepare your Metol Working Solution and Molybdate Working Solution under fume hood
a. Locate NALGENE container labeled Metol and Molybdate
b. For Molybdate Working Solution gather the Molybdate, 1 M HCl, and nano-pure water
i. Fill container first with 300/460 mL of nano-pure water
ii. Then add 60/92 mL of Molybdate
iii. Then add 60/92 mL of 1 M HCl
iv. Once combined pipette 14 mL of this solution into EACH starred vial
c. For Metol Working Solution gather Metol, Sulfuric acid, and Oxalic Acid
i. First add 60/92 mL of Metol
ii. Then add 60/92 mL of Sulfuric Acid
iii. Then add 60/92 mL of Oxalic Acid
iv. DO NOTHING WITH THIS RIGHT NOW
9. After the last hour in the oven (5 hrs. total) remove the tubes, TIGHTEN the caps, and place individually in vortex mixer
10. Centrifuge the tubes at 2800 rpm for 20 min
11. Place scintillation vials 1-16/32 in front of you and pour a small amount of each centrifuge tube into the corresponding vial
12. Now have scintillation vials B and 1-16/32 in order and easy to grab, and do the same with *B and 1-16
a. Every 30 seconds pipette 0.1 mL starting with vial B into *B, 1 into *1 through vial 16
b. Then do the same process with the standard starting with vial 0 into *0, 50 into *50 through 500
13. Wait 20 min for the reaction to occur and then add 6 mL of the Metol Working Solution to EACH starred vial
Day 3
1. Locate a tray of Cuvettes and turn on UV-VIS Spectrophotometer
2. Pull out starred standard vials only
a. Pour between triangle and rectangle for *B and the first five standards
i. ALWAYS LEAVE B IN MACHINE FOR ENTIRE PROCESS
ii. Measure and record absorbance for those and all standards
b. Make sure machine is now on samples
i. Measure record absorbance for all starred numbered vials now

## Sheet: Biogenic Silica Results
mg/L	mM	Absorbance					ID	Core	Depth (mbsf)	Depth (cm)	Weight (g)	Abs	mM SiO2	Dilution Factor	Bsi(‰)	Bsi(%)	Weight (mg)
Standard	(mg/L)/60.0848	Set1					IODP 379-1	379-U1532C-6F-Sec1	197.35	25-25.3	0.0531	0.296	2.15428	0.0861712	97.5061	9.75061	53.1
0	0	0.032					IODP 379-31	379-U1532C-6F-Sec1	197.4	29.5-30	0.0567	0.596	4.33767	0.173507	183.865	18.3865	56.7
50	0.832157	0.148					IODP 379-2	379-U1532C-6F-Sec1	197.46	35-36	0.0545	0.342	2.48907	0.0995626	109.765	10.9765	54.5
100	1.66431	0.266					IODP 379-33	379-U1532C-6F-Sec1	197.495	39-39.5	0.0538	0.333	2.66152	0.106461	118.897	11.8897	53.8
150	2.49647	0.264					IODP 379-34	379-U1532C-6F-Sec1	197.535	43-43.5	0.054	0.359	2.86933	0.114773	127.706	12.7706	54
200	3.32863	0.309					IODP 379-3	379-U1532C-6F-Sec1	197.55	45-45.5	0.0538	0.483	3.51526	0.14061	157.036	15.7036	53.8
250	4.16079	0.389					IODP 379-4	379-U1532C-6F-Sec1	197.66	55-56	0.053	0.517	3.76271	0.150508	170.628	17.0628	53
300	4.99294	0.688					IODP 379-35	379-U1532C-6F-Sec1	197.7	59.5-60	0.0532	0.454	3.62862	0.145145	163.928	16.3928	53.2
350	5.8251	0.797					IODP 379-36	379-U1532C-6F-Sec1	197.71	60.5-61	0.0531	0.491	5.45092	0.218037	246.718	24.6718	53.1
400	6.65726	0.896					IODP 379-5	379-U1532C-6F-Sec1	197.77	65-66	0.0533	0.682	4.96357	0.198543	223.816	22.3816	53.3
450	7.48941	0.986					IODP 379-6	379-U1532C-6F-Sec1	197.85	74.5-75	0.0557	0.939	6.83401	0.273361	294.88	29.488	55.7
500	8.32157	1.116					IODP 379-32	379-U1532C-6F-Sec1	197.9	79.5-80	0.0563	0.271	1.97233	0.0788932	84.1968	8.41968	56.3
							IODP 379-7	379-U1532C-6F-Sec1	197.95	85-85.5	0.055	0.751	5.46575	0.21863	238.843	23.8843	55
SiO2= 60.048 g/mol							IODP 379-37	379-U1532C-6F-Sec1	198	89.5-90	0.0542	0.639	5.10724	0.20429	226.471	22.6471	54.2
							IODP 379-38	379-U1532C-6F-Sec1	198.01	90.5-91	0.0538	0.512	4.09219	0.163687	182.809	18.2809	53.8
7.27797							IODP 379-8	379-U1532C-6F-Sec1	198.045	94-94.5	0.0569	0.692	5.03635	0.201454	212.73	21.273	56.9
							IODP 379-39	379-U1532C-6F-Sec1	198.12	101.5-102	0.0567	1.24	9.02468	0.360987	382.537	38.2537	56.7
							IODP 379-9	379-U1532C-6F-Sec1	198.17	106-106.5	0.0535	0.652	4.74524	0.189809	213.171	21.3171	53.5
							IODP 379-10	379-U1532C-6F-Sec1	198.25	114.5-115.5	0.0569	0.568	4.13389	0.165355	174.611	17.4611	56.9
							IODP 379-40	379-U1532C-6F-Sec1	198.28	118-118.5	0.056	0.241	1.92621	0.0770482	82.6683	8.26683	56
							IODP 379-41	379-U1532C-6F-Sec1	198.31	120.5-121.5	0.0535	0.194	1.55056	0.0620222	69.6559	6.96559	53.5
							IODP 379-11	379-U1532C-6F-Sec1	198.35	125-125.5	0.0561	0.583	4.24306	0.169722	181.778	18.1778	56.1
							IODP 379-12	379-U1532C-6F-Sec1	198.45	134.5-135.5	0.056	0.564	4.10477	0.164191	176.168	17.6168	56
							IODP 379-42	379-U1532C-6F-Sec1	198.48	137.5-138	0.0556	0.18	1.43866	0.0575464	62.1882	6.21882	55.6
							IODP 379-43	379-U1532C-6F-Sec1	198.5	140-140.5	0.0543	0.167	1.33476	0.0533903	59.0781	5.90781	54.3
							IODP 379-13	379-U1532C-6F-Sec1	198.55	145-145.5	0.0541	0.608	4.42501	0.177	196.581	19.6581	54.1
							IODP 379-14	379-U1532C-6F-Sec2	198.66	5.0-6.0	0.0563	0.632	4.59968	0.183987	196.356	19.6356	56.3
							IODP 379-44	379-U1532C-6F-Sec2	198.695	8.5-9.5	0.0548	0.346	2.51818	0.100727	110.441	11.0441	54.8
							IODP 379-15	379-U1532C-6F-Sec2	198.75	15-15.5	0.054	0.432	3.14408	0.125763	139.934	13.9934	54
							IODP 379-45	379-U1532C-6F-Sec2	198.76	16-16.5	0.0557	0.153	1.22286	0.0489144	52.7651	5.27651	55.7
							IODP 379-46	379-U1532C-6F-Sec2	198.81	20.5-21.5	0.0542	0.136	1.08699	0.0434795	48.2003	4.82003	54.2
							IODP 379-16	379-U1532C-6F-Sec2	198.85	25-25.5	0.0536	0.425	3.09314	0.123725	138.694	13.8694	53.6
							IODP 379-29	379-U1532C-6F-Sec2	198.945	34-34.5	0.0534	0.152	1.10625	0.0442501	49.7894	4.97894	53.4
							IODP 379-17	379-U1532C-6F-Sec2	198.96	35-36	0.0542	0.641	4.66518	0.186607	206.868	20.6868	54.2
							IODP 379-47	379-U1532C-6F-Sec2	199	39-40	0.0566	0.371	2.70013	0.108005	114.655	11.4655	56.6
							IODP 379-30	379-U1532C-6F-Sec2	199.02	41.5-42	0.054	0.139	1.01164	0.0404655	45.0252	4.50252	54
							IODP 379-18	379-U1532C-6F-Sec2	199.055	45-45.5	0.0549	0.333	2.42356	0.0969425	106.098	10.6098	54.9
							IODP 379-25	379-U1532C-6F-Sec2	199.09	48.5-49	0.0533	0.08	0.582238	0.0232895	26.2541	2.62541	53.3
							IODP 379-48	379-U1532C-6F-Sec2	199.1	49.5-50	0.0557	0.164	1.19359	0.0477435	51.5019	5.15019	55.7
							IODP 379-22	379-U1532C-6F-Sec2	199.12	51.5-52	0.0548	0.208	1.51382	0.0605527	66.3923	6.63923	54.8
							IODP 379-19	379-U1532C-6F-Sec2	199.154	54-54.5	0.0568	0.081	0.589515	0.0235806	24.9443	2.49443	56.8
							IODP 379-27	379-U1532C-6F-Sec2	199.155	55-55.5	0.0557	0.384	2.79474	0.11179	120.59	12.059	55.7
							IODP 379-24	379-U1532C-6F-Sec2	199.185	58-58.5	0.0543	0.054	0.39301	0.0157204	17.3952	1.73952	54.3
							IODP 379-28	379-U1532C-6F-Sec2	199.42	81.5-82	0.0557	0.389	2.83113	0.113245	122.16	12.216	55.7
							IODP 379-20	379-U1532C-6F-Sec2	199.435	83-83.5	0.0551	0.099	0.720519	0.0288208	31.4281	3.14281	55.1
							IODP 379-21	379-U1532C-6F-Sec2	199.455	85-85.5	0.0543	0.228	1.65938	0.0663751	73.4463	7.34463	54.3
							IODP 379-26	379-U1532C-6F-Sec2	199.48	87.5-88	0.0537	0.23	1.67393	0.0669573	74.9184	7.49184	53.7
							IODP 379-23	379-U1532C-6F-Sec2	199.495	89-89.5	0.0544	0.195	1.4192	0.0567682	62.7004	6.27004	54.4

## Sheet: IRD Visual Inspection
Depth (mbsf)	Depth (cm)	IRD Categorization	Visual Inspection Notes
197.318	21.8	Group of small clasts	Clasts <0.5cm
197.324	22.4	Group of small clasts	Clasts <0.5cm
197.366	26.6	Group of small clasts	Clasts <0.5cm
197.403	30.3	1 Large clast with group of small clasts	Large clast >0.5cm
			Small clasts <0.5cm
197.409	30.9	Group of small clasts	Clasts <0.5cm
197.412	31.2	Group of small clasts	Clasts <0.5cm
197.418	31.8	Group of small clasts	Clasts <0.5cm
197.438	33.8	Group of small clasts	Clasts <0.5cm
197.491	39.1	Group of small clasts	Clasts <0.5cm
197.498	39.8	Group of small clasts	Clasts <0.5cm
197.503	40.3	Group of small clasts	Clasts <0.5cm
197.51	41	Group of small clasts	Clasts <0.5cm
197.516	41.5	Group of small clasts	Clasts <0.5cm
197.523	42.3	Group of small clasts	Clasts <0.5cm
197.53	43	Group of small clasts	Clasts <0.5cm
197.535	43.5	Group of small clasts	Clasts <0.5cm
197.542	44.2	1 Large clast	Clast >0.5cm
197.548	44.8	Group of small clasts	Clasts <0.5cm
197.56	46	Group of small clasts	Clasts <0.5cm
197.567	46.7	Group of small clasts	Clasts <0.5cm
197.577	47.7	1 Large clast with group of small clasts	Large clast >0.5cm
			Small clasts <0.5cm
197.578	47.8	1 Large clast	Clast >0.5cm
197.585	48.5	Group of small clasts	Clasts <0.5cm
197.59	49	Group of small clasts	Clasts <0.5cm
197.596	49.6	1 Large clast	Clast >0.5cm
197.601	50.1	Group of small clasts	Clasts <0.5cm
197.608	50.8	Group of small clasts	Clasts <0.5cm
197.614	51.4	Group of small clasts	Clasts <0.5cm
197.621	52.1	Group of small clasts	Clasts <0.5cm
197.627	52.7	Group of small clasts	Clasts <0.5cm
197.634	53.4	Group of small clasts	Clasts <0.5cm
197.639	53.9	Group of small clasts	Clasts <0.5cm
197.647	54.7	Group of small clasts	Clasts <0.5cm
197.653	55.3	Group of small clasts	Clasts <0.5cm
197.66	56	Group of small clasts	Thin Diatomite Layer ~0.25cm Small clasts <0.5cm
197.671	57.1	Group of small clasts	Clasts <0.5cm
197.677	57.7	Group of small clasts	Clasts <0.5cm
197.685	58.5	Group of small clasts	Clasts <0.5cm
197.691	59.1	Group of small clasts	Clasts <0.5cm
197.698	59.8	Group of small clasts	Clasts <0.5cm
197.705	60.5	Group of small clasts	Clasts <0.5cm
197.711	61.1	Group of small clasts	Clasts <0.5cm
197.718	61.8	Group of small clasts	Clasts <0.5cm
197.724	62.4	Group of small clasts	Clasts <0.5cm
197.742	64.2	Group of small clasts	Thin Diatomite Layer ~0.25cm Small clasts <0.5cm
197.747	64.7	Group of small clasts	Thin Diatomite Layer ~0.25cm Small clasts <0.5cm
197.753	65.3	Group of small clasts	Thin Diatomite Layer ~0.25cm Small clasts <0.5cm
197.76	66	Group of small clasts	Clasts <0.5cm
197.785	68.5	Group of small clasts	Clasts <0.5cm
197.792	69.2	Group of small clasts	Thin Diatomite Layer ~0.25cm Small clasts <0.5cm
197.798	69.8	Group of small clasts	Clasts <0.5cm
197.804	70.4	Group of small clasts	Clasts <0.5cm
197.81	71	Group of small clasts	Thin Diatomite Layer ~0.25cm Small clasts <0.5cm
197.813	71.3	Group of small clasts	Clasts <0.5cm
197.825	72.5	Group of small clasts	Clasts <0.5cm
197.833	73.3	Group of small clasts	Thin Diatomite Layer ~0.25cm Small clasts <0.5cm
197.839	73.9	Group of small clasts	Clasts <0.5cm
197.846	74.6	1 Large clast	Fecal Pellet with Barite Deposit
			Clast >0.5cm
197.852	75.2	Group of small clasts	Fecal Pellet with Barite Deposit
			Small clasts <0.5cm
197.859	75.9	Group of small clasts	Thin Diatomite Layer ~0.25cm Small clasts <0.5cm
197.866	76.6	Group of small clasts	Thin Diatomite Layer ~0.25cm Small clasts <0.5cm
197.872	77.2	Group of small clasts	Thin Diatomite Layer ~0.25cm Small clasts <0.5cm
197.879	77.9	Group of small clasts	Clasts <0.5cm
197.885	78.5	Group of small clasts	Barite Cluster
			Small clasts <0.5cm
197.892	79.2	Group of small clasts	Clasts <0.5cm
197.905	80.5	Group of small clasts	Thin Diatomite Layer ~0.25cm Small clasts <0.5cm
197.92	82	Group of small clasts	Clasts <0.5cm
197.939	83.9	Group of small clasts	Clasts <0.5cm
197.946	84.6	Group of small clasts	Clasts <0.5cm
197.952	85.2	Group of small clasts	Clasts <0.5cm
197.958	85.8	Group of small clasts	Clasts <0.5cm
197.965	86.5	Group of small clasts	Clasts <0.5cm
197.989	88.9	Group of small clasts	Clasts <0.5cm
197.996	89.6	Group of small clasts	Clasts <0.5cm
198.002	90.2	Group of small clasts	Clasts <0.5cm
198.009	90.9	Group of small clasts	Clasts <0.5cm
198.012	91.2	Group of small clasts	Clasts <0.5cm
198.027	92.7	Group of small clasts	Clasts <0.5cm
198.033	93.3	Group of small clasts	Clasts <0.5cm
198.04	94	Group of small clasts	Clasts <0.5cm
198.046	94.6	Group of small clasts	Clasts <0.5cm
198.053	95.3	Group of small clasts	Clasts <0.5cm
198.059	95.9	Group of small clasts	Clasts <0.5cm
198.093	99.3	Group of small clasts	Clasts <0.5cm
198.1	100	Group of small clasts	Clasts <0.5cm
198.107	100.7	Group of small clasts	Clasts <0.5cm
198.113	101.3	Group of small clasts	Clasts <0.5cm
198.12	102	Group of small clasts	Clasts <0.5cm
198.134	103.4	Group of small clasts	Thin Diatomite Layer ~0.25cm Small clasts <0.5cm
198.14	104	Group of small clasts	Thin Diatomite Layer ~0.25cm Small clasts <0.5cm
198.147	104.7	Group of small clasts	Clasts <0.5cm
198.155	105.5	Group of small clasts	Clasts <0.5cm
198.162	106.2	Group of small clasts	Clasts <0.5cm
198.169	106.9	Group of small clasts	Clasts <0.5cm
198.175	107.5	Group of small clasts	Clasts <0.5cm
198.182	108.2	Group of small clasts	Clasts <0.5cm
198.189	108.9	Group of small clasts	Clasts <0.5cm
198.194	109.4	Group of small clasts	Clasts <0.5cm
198.201	110.1	Group of small clasts	Clasts <0.5cm
198.207	110.7	Group of small clasts	Clasts <0.5cm
198.219	111.9	Group of small clasts	Clasts <0.5cm
198.227	112.7	Group of small clasts	Clasts <0.5cm
198.232	113.2	Group of small clasts	Clasts <0.5cm
198.245	114.5	Group of small clasts	Clasts <0.5cm
198.251	115.1	Group of small clasts	Clasts <0.5cm
198.258	115.8	Group of small clasts	Thin Diatomite Layer ~0.25cm Small clasts <0.5cm
198.265	116.5	Group of small clasts	Clasts <0.5cm
198.272	117.2	Group of small clasts	Clasts <0.5cm
198.278	117.8	Group of small clasts	Clasts <0.5cm
198.285	118.5	Group of small clasts	Clasts <0.5cm
198.299	119.9	Group of small clasts	Clasts <0.5cm
198.305	120.5	Group of small clasts	Clasts <0.5cm
198.312	121.2	Group of small clasts	Clasts <0.5cm
198.33	123	Group of small clasts	Clasts <0.5cm
198.34	124	Group of small clasts	Clasts <0.5cm
198.346	124.6	Group of small clasts	Thin Diatomite Layer ~0.25cm Small clasts <0.5cm
198.357	125.7	Group of small clasts	Clasts <0.5cm
198.364	126.4	Group of small clasts	Clasts <0.5cm
198.37	127	Group of small clasts	Clasts <0.5cm
198.377	127.7	Group of small clasts	Clasts <0.5cm
198.383	128.3	Group of small clasts	Thin Diatomite Layer ~0.25cm Small clasts <0.5cm
198.389	128.9	Group of small clasts	Clasts <0.5cm
198.396	129.6	Group of small clasts	Clasts <0.5cm
198.403	130.3	Group of small clasts	Clasts <0.5cm
198.409	130.9	Group of small clasts	Clasts <0.5cm
198.422	132.2	Group of small clasts	Clasts <0.5cm
198.429	132.9	Group of small clasts	Clasts <0.5cm
198.435	133.5	Group of small clasts	Clasts <0.5cm
198.444	134.4	Group of small clasts	Clasts <0.5cm
198.45	135	Group of small clasts	Clasts <0.5cm
198.457	135.7	Group of small clasts	Clasts <0.5cm
198.463	136.3	Group of small clasts	Clasts <0.5cm
198.469	136.9	Group of small clasts	Clasts <0.5cm
198.476	137.6	Group of small clasts	Clasts <0.5cm
198.489	138.9	Group of small clasts	Clasts <0.5cm
198.496	139.6	Group of small clasts	Clasts <0.5cm
198.502	140.2	Group of small clasts	Thin Diatomite Layer ~0.25cm Small clasts <0.5cm
198.509	140.9	Group of small clasts	Clasts <0.5cm
198.561	146.1	Group of small clasts	Thin Diatomite Layer ~0.25cm Small clasts <0.5cm
198.574	147.4	Group of small clasts	Thin Diatomite Layer ~0.25cm Small clasts <0.5cm
198.581	148.1	Group of small clasts	Thin Diatomite Layer ~0.25cm Small clasts <0.5cm
198.586	148.6	Group of small clasts	Thin Diatomite Layer ~0.25cm Small clasts <0.5cm
198.592	149.2	Group of small clasts	Thin Diatomite Layer ~0.25cm Small clasts <0.5cm
198.599	149.9	Group of small clasts	Thin Diatomite Layer ~0.25cm Small clasts <0.5cm
198.606	0.6	Group of small clasts	Thin Diatomite Layer ~0.25cm Small clasts <0.5cm
198.613	1.3	Group of small clasts	Clasts <0.5cm
198.625	2.5	Group of small clasts	Clasts <0.5cm
198.631	3.1	Group of small clasts	Clasts <0.5cm
198.637	3.7	Group of small clasts	Clasts <0.5cm
198.644	4.4	Group of small clasts	Clasts <0.5cm
198.65	5	Group of small clasts	Thin Diatomite Layer ~0.25cm Small clasts <0.5cm
198.657	5.7	Group of small clasts	Thin Diatomite Layer ~0.25cm Small clasts <0.5cm
198.663	6.3	Group of small clasts	Bioturbation
			Small clasts <0.5cm
198.669	6.9	Group of small clasts	Bioturbation
			Small clasts <0.5cm
198.676	7.6	Group of small clasts	Thin Diatomite Layer ~0.25cm Small clasts <0.5cm
198.682	8.2	Group of small clasts	Clasts <0.5cm
198.689	8.9	Group of small clasts	Clasts <0.5cm
198.708	10.8	Group of small clasts	Clasts <0.5cm
198.714	11.4	Group of small clasts	Clasts <0.5cm
198.721	12.1	Group of small clasts	Clasts <0.5cm
198.727	12.7	Group of small clasts	Clasts <0.5cm
198.74	14	Group of small clasts	Clasts <0.5cm
198.775	17.5	Group of small clasts	Clasts <0.5cm
198.908	30.8	Group of small clasts	Clasts <0.5cm
198.94	34	Group of small clasts	Clasts <0.5cm
198.942	34.2	Group of small clasts	Clasts <0.5cm
198.955	35.5	Group of small clasts	Clasts <0.5cm
198.961	36.1	Group of small clasts	Clasts <0.5cm
198.968	36.8	Group of small clasts	Clasts <0.5cm
198.974	37.4	Group of small clasts	Clasts <0.5cm
