# Supplementary material for: Direct link between iceberg melt and diatom productivity demonstrated in Mid-Pliocene Amundsen Sea interglacial sediments
Source: Copernicus journal article supplement (doi:10.5194/jm-43-269-2024), 2024-08-01
Supplement: Supplementary file [file jm-43-269-2024-supplement-title-page.pdf › jm-43-269-2024-supplement-title-page.pdf]

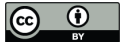

*Supplement of*

**Direct link between iceberg melt and diatom productivity demonstrated in Mid-Pliocene Amundsen Sea interglacial sediments**

**Heather Furlong and Reed Paul Scherer**

*Correspondence to:* Heather Furlong (heatherfurlong4@gmail.com)

- jm-43-269-2024-supplement-title-page.pdf
- Heather\_Furlong-Supplementary\_Data 6-20.xlsx

The copyright of individual parts of the supplement might differ from the article licence.
